# Supplementary material
Source: publisher site journal article supplement (https://www.kjim.org/upload/media/kjim-2021-308-suppl8.pdf)
Supplement: Supplementary file 1 [file kjim-2021-308-suppl8.pdf]

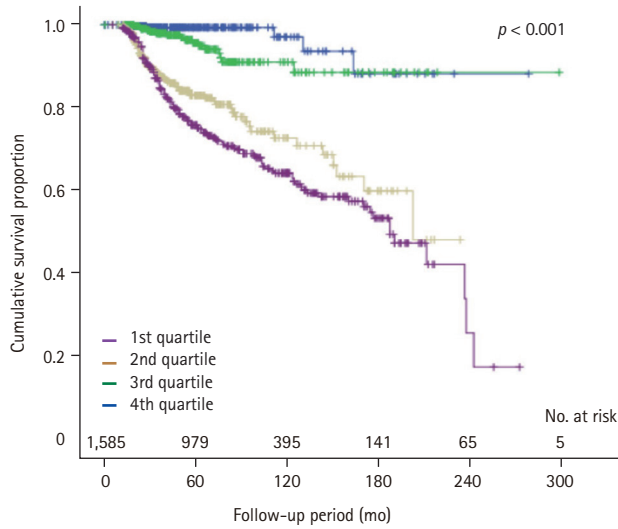

**Supplementary Figure 2.** Cumulative survival rate for development of the condition with remaining estimated glomerular filtration rate (eGFR) < 60 mL/min/1.73 m<sup>2</sup> according to the quartile of initial eGFR at donation. The lowest (1st) quartile represented lowest initial eGFR at donation, and the highest (4th) quartile represented highest initial eGFR at donation.
